# Supplementary material for: Differential Impact of IL-32 Isoforms on the Functions of Coronary Artery Endothelial Cells: A Potential Link with Arterial Stiffness and Atherosclerosis
Source: MDPI journal article supplement (doi:10.3390/v15030700), 2023-03-08
Supplement: s1 [file s1]

# Differential impact of IL-32 isoforms on the functions of coronary artery endothelial cells: A potential link with arterial stiffness and atherosclerosis

Rémi Bunet <sup>1,2</sup>, Marie-Hélène Roy-Cardinal <sup>3</sup>, Hardik Ramani <sup>1,2</sup>, Aurélie Cleret-Buhot <sup>2</sup>, Madeleine Durand <sup>2,4</sup>, Carl Chartrand-Lefebvre <sup>2,5</sup>, Jean-Pierre Routy <sup>6</sup>, Réjean Thomas <sup>7</sup>, Benoît Trottier <sup>8</sup>, Petronela Ancuta <sup>1,2</sup>, David B. Hanna<sup>9</sup>, Alan L. Landay <sup>10</sup>, Guy Cloutier <sup>3,5,11</sup>, Cécile L. Tremblay <sup>1,2,†,\*</sup> and Mohamed El-Far <sup>2,†,\*</sup>

<sup>1</sup> Département de Microbiologie, Infectiologie et Immunologie, Faculté de Médecine, Université de Montréal, Montréal, H3C 3J7, QC, Canada,

<sup>2</sup> Centre de Recherche du Centre Hospitalier de l'Université de Montréal (CRCHUM), Montréal, H2X 0A9, QC, Canada,

<sup>3</sup> Laboratory of Biorheology and Medical Ultrasonics, Centre de Recherche du Centre Hospitalier de l'Université de Montréal (CRCHUM), Montréal, H2X 0A9, QC, Canada,

<sup>4</sup> Département de Médecine, Faculté de Médecine, Université de Montréal, H3T 1J4, QC, Canada

<sup>5</sup> Département de Radiologie, Radio-oncologie et Médecine Nucléaire, Faculté de Médecine, Université de Montréal, Montréal, H3C 3J7, QC, Canada,

<sup>6</sup> Chronic Viral Illness Service, division of hematology, McGill University Health Centre, Montréal and Research Institute of McGill University Health Centre, Montréal, H4A 3J1, QC, Canada

<sup>7</sup> Clinique médicale l'Actuel, Montréal, H2L 4P9, QC, Canada,

<sup>8</sup> Centre de médecine urbaine du Quartier latin, Montréal, H2L 4E9, QC, Canada,

<sup>9</sup> Department of Epidemiology and Population Health, Albert Einstein College of Medicine, Bronx, NY 10461, USA,

<sup>10</sup> Department of Internal Medicine, Rush University Medical Center, Chicago, 60612, IL, United States

<sup>11</sup> Institut de génie biomédical, Université de Montréal, Montréal, H3T 1J4, QC, Canada,

† These authors contributed equally to this work.

\* Correspondence: c.tremblay@umontreal.ca (C.L.T.); mohamed.el.far.chum@ssss.gouv.qc.ca (M.E.-F.)

## Supplemental materials

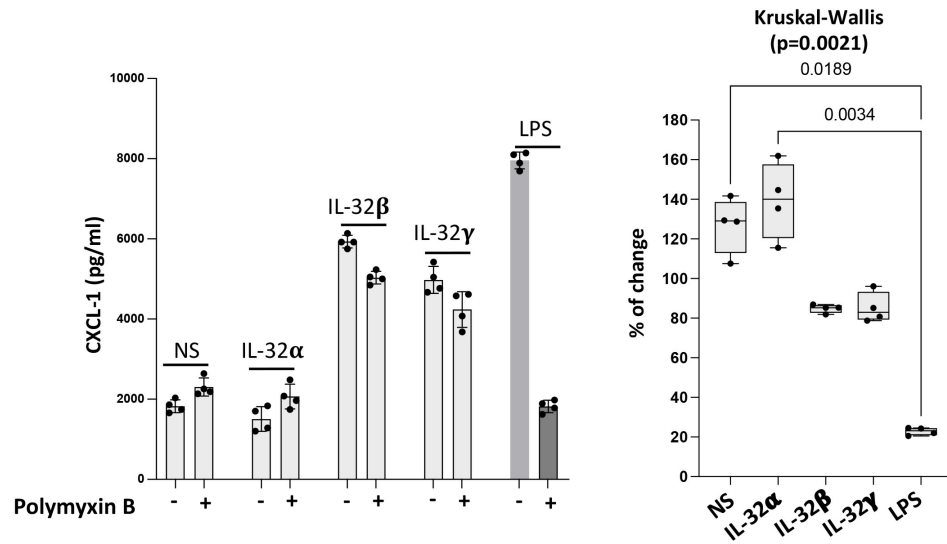

**Supplemental Figure S1: Impact of Polymyxin B on CAEC. CXCL-1 expression by CAEC following stimulation with IL-32 isoforms (500ng/ml) or LPS (500ng/ml) in the presence or absence of Polymyxin B.** Left panel: CXCL-1 levels in pg/ml. Right panel: Percentage of change (increase or decrease) in CXCL-1 expression for each condition (Non-stimulated NS, IL-32 $\alpha$ -, IL-32 $\beta$ -, IL-32 $\gamma$ - and LPS-stimulated cells) from the left panel generated by the ratio between Polymyxin B treated to untreated condition. NS: non-stimulated.

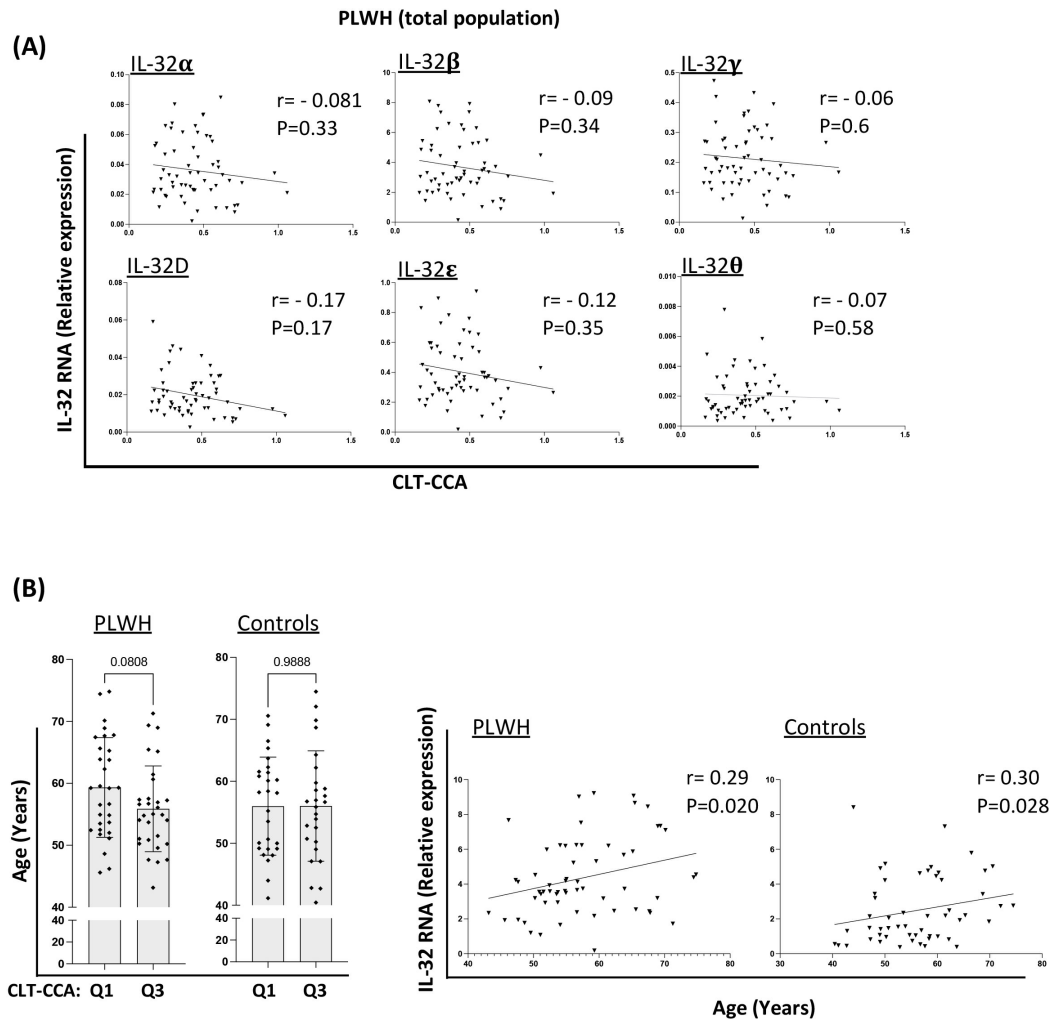

**Supplemental Figure S2: A)** Association between IL-32 expression and carotid artery wall stiffness in the total PLWH population. **B)** Age comparison within the lower (Q1) and upper (Q3) quartiles of CLT-CCA of PLWH ( $n=30$  per quartile) and controls ( $n=27$  for Q1 and  $n=26$  for Q3), Left panels. Right panel: correlations between total IL-32RNA from PLWH ( $n=60$ , left panel) and controls ( $n=53$ , right panel) and age. Q1: First quartile, Q3: Third quartile. CLT: Cumulated lateral translation in common carotid artery.
